# Supplementary material for: Channel Competition and Coordination of E-Commerce Platforms under Low-Carbon Environment: A Cooperative Game Approach
Source: Hindawi journal article supplement (doi:10.1155/2022/3595327), 2022-09-28
Supplement: f1 [file 3595327.f1.docx]

## Supplementary Materials

**Appendix A. Proof of Proposition 1**

First, substituting demand functions and into the profit function of P, R one has , and we can get the initial valueand .And we substitute and into demand functionsand . Next, substituting the new and into . As such, we can get , ,and . To make the above matrix higher than 0, we can get the condition that . And these formulas proved above matrix is a negative definite matrix, so and have unique solutions. By the first-order conditions , we obtain the value of and. And

Substituting them into and . And then substituting ,,and into all profits function, we can get the final profits what we have listed in proposition 1.

**Appendix B. Proof of Proposition 2**

Substitutingtheand intothe profit function and taking partial derivatives of the channel profit with respect to prices and low-carbon level, we have ,, ,. , Therefore,we can obtain a matrix is that,and its leading principle minor is that , and . To make the we can get the condition is that . At this point, the, and have the only solution. Then, solving the ternary linear equation ,and , and we obtain the value of , andare that Next, substituting them into demand function and profit function, we can see the results as proposition 2 what we’ve listed.

**Appendix C. Proof of Proposition 3**

Substituting demand functions and into R’s profit function and taking partial derivatives . Next, solving the , we can get . Then substituting it into demand functions and profit function of coalition MP. We take partial derivatives , , , . , . Next, we can obtain a matrix form is that ,To make and , we find the range of is that .Subsequently, by solving the equations ,,, we can obtain the value of , and. Substituting them into demand functions and , we can obtain the final results of demands and reail price of R. Finally we Substitutes all equilibrium solution into profit functions, the final results will be seen as proposition 3.

**Appendix D. Proof of Proposition 4**

Plugging demand functions and into P’s profit function and taking partial derivatives, we have . This implies that has a unique solution. By solving , we can obtain . Plugging it into demand functions, and then substituting new demand functions into . We have , , , . , . Next, we can obtain a matrix form is that , To make and , we find the range of is that .Subsequently, by solving the equations , ,, we can obtain the value of , and. Substituting them into demand functions and , we can obtain the final results of demands and reail price of P. Finally we Substitutes all equilibrium solutions into profit functions, the final results will be seen as proposition 4.

**Appendix E. Proof of Proposition 5**

Plugging demand functions and into coalition PR’s profit function and taking partial derivatives, we have ,. . And we can get , this implies that and have a unique solution. By solving and , we can obtain and . Plugging it into demand functions, and then substituting new demand functions into . We have , , .Next, we can obtain a matrix form is that , To make ,and we find the range of is that .Subsequently, by solving the equations and , we can obtain the value of and. Plugging them into demand functions and , . we can obtain the final results of demands and reail price of P and R. Finally, we substitute all equilibrium solutions into profit functions, the final results will be seen as proposition 5.

**AppendixF. Proof of Proposition 6**

Proposition 6 (1);Conversely,,; And we can see the range of from Fig.2.

Proposition 6 (2) ;Conversely,,.

,. So,

Proposition 6 (3) ;Conversely,,; And we can see the range of from Fig.3.

Proposition 6 (3) ;;, and , ; so we can obtain that

**AppendixG. Proof of Proposition 7**

Proposition 7 (1);

Proposition 7 (2),;

Proposition 7 (2) ifis established, and and we draw the picture to show the range of from Fig.4

**AppendixH. Proof of Proposition 8**

In this section, we also use the way of “subtraction” to compare partial coalition profits with profit of non-cooperative models. And we also can obtain range of some parameters from Fig.5. The whole process and the conditions used are the same as **AppendixG.**

Proposition 8 (1);Conversely,,; And we can see the range of from Fig.5a.

Proposition 8 (1);And we can see the blue area offrom Fig.5b to 5d.

Proposition 8 (2) ;

Proposition 8 (2) ;

Conversely,**,;**

Proposition 8 (3) ;

Conversely,**,;**

Proposition 8 (3) ;
